# Supplementary material
Source: MDPI journal article supplement (https://www.mdpi.com/2073-4468/10/3/24)
Supplement: s1 [file s1]

**Supplementary Table 1:** Distribution of the molecular subtypes of breast cancer cases

| Type                      | Luminal A | Luminal B | Her 2   | TN      |
|---------------------------|-----------|-----------|---------|---------|
| <b>Number of Patients</b> | 25 (36)*  | 22 (32)   | 10 (14) | 12 (17) |

\* number in brackets represents the percentage of cases

**Supplementary Table 2:** Conditions used for manual Immunohistochemical detection of PD-L1 on FFPE tissues

| Antibody     | Antigen Retrieval |               | Antibody diluent | Antibody dilution | Incubation | Secondary antibody |
|--------------|-------------------|---------------|------------------|-------------------|------------|--------------------|
|              | Solution          | Conditions    |                  |                   |            |                    |
| <b>E1L3N</b> | CC1               | 121°C /6 min  | CS (#8114)       | 1:200             | OVN        | Envision G/2       |
| <b>28-8</b>  |                   | 110 C/ 10 min | 0.1% BSA         | 1:500             |            | Envision Flex      |

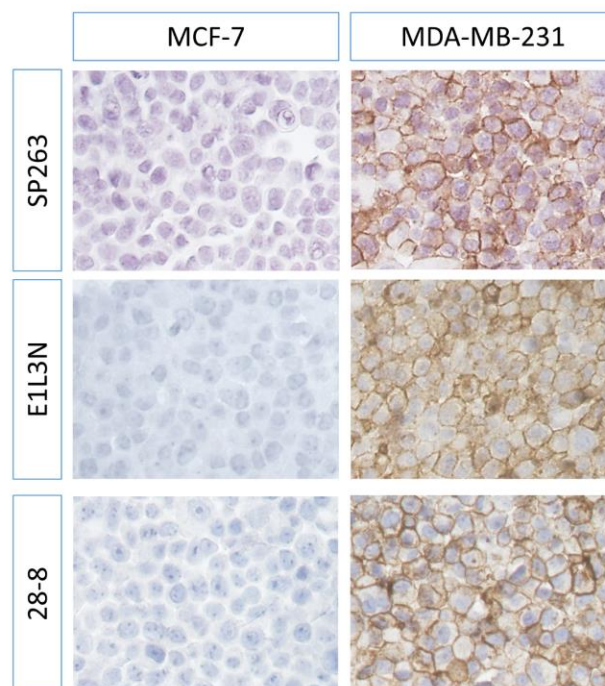

**Figure 1 Performance of the three anti-PD-L1 antibodies in FFPE sections.** Representative images of immunohistochemical detection for PD-L1 (brown) using three different antibodies in sections of FFPE sections of positive (MDA-MB-231) and negative (MCF7) controls examined under a light microscope at x400 magnification.

Supplementary figure 1
